# Supplementary material for: Designing a Recombinant Vaccine against Providencia rettgeri Using Immunoinformatics Approach
Source: MDPI journal article supplement (doi:10.3390/vaccines10020189), 2022-01-25
Supplement: s1 [file s1]

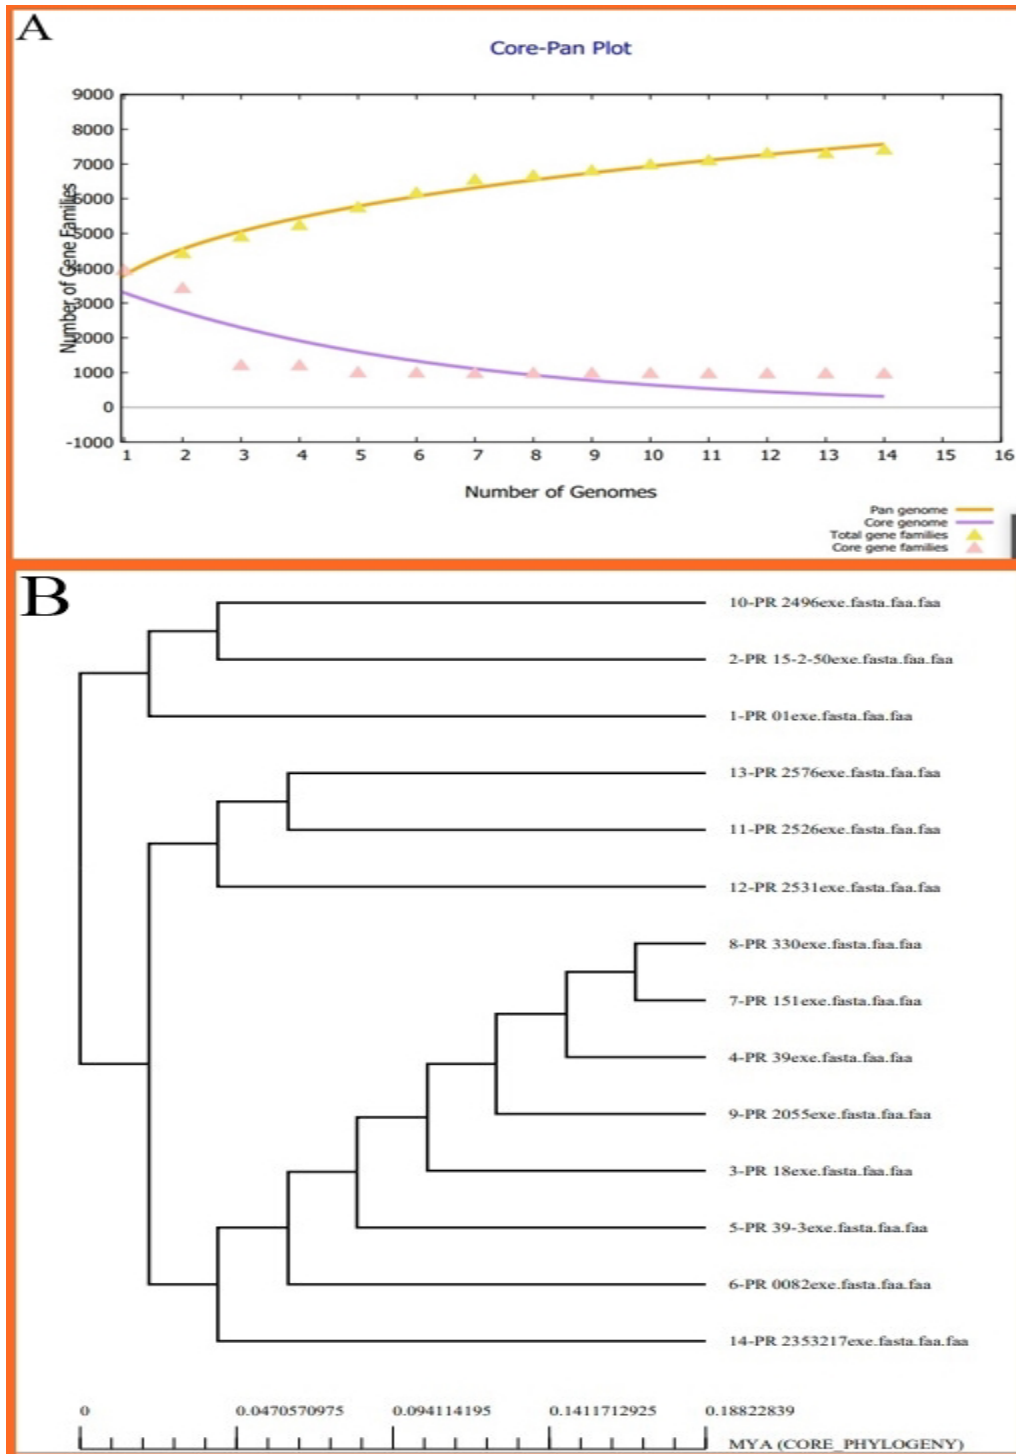

**Figure S1.** (A) Core pan plot of 14 *P. rettgeri* genome. (B) Pan-phylogeny tree of 14 complete genomes of *P. rettgeri*.

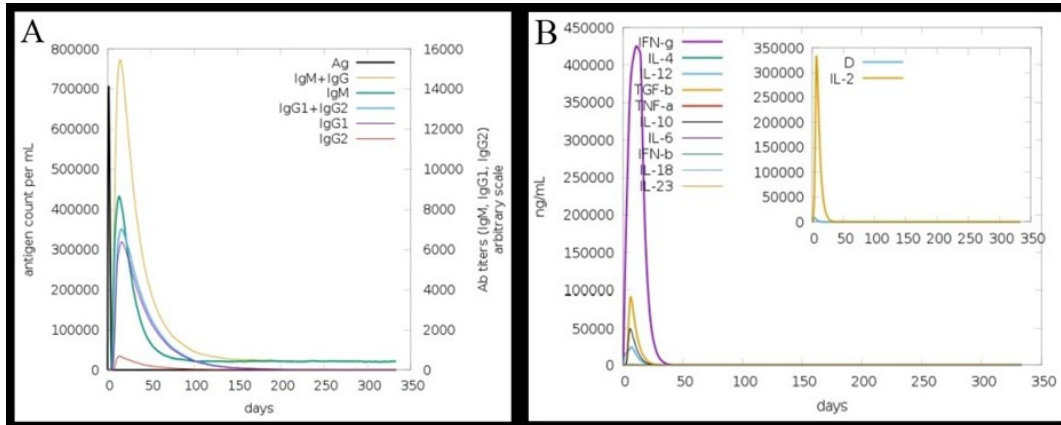

**Figure S2. A.** Antibody titer as shown in different color peaks in response to the vaccine injection (black color peak). **B** Simulation of interleukins and interferon level after injection of vaccine.

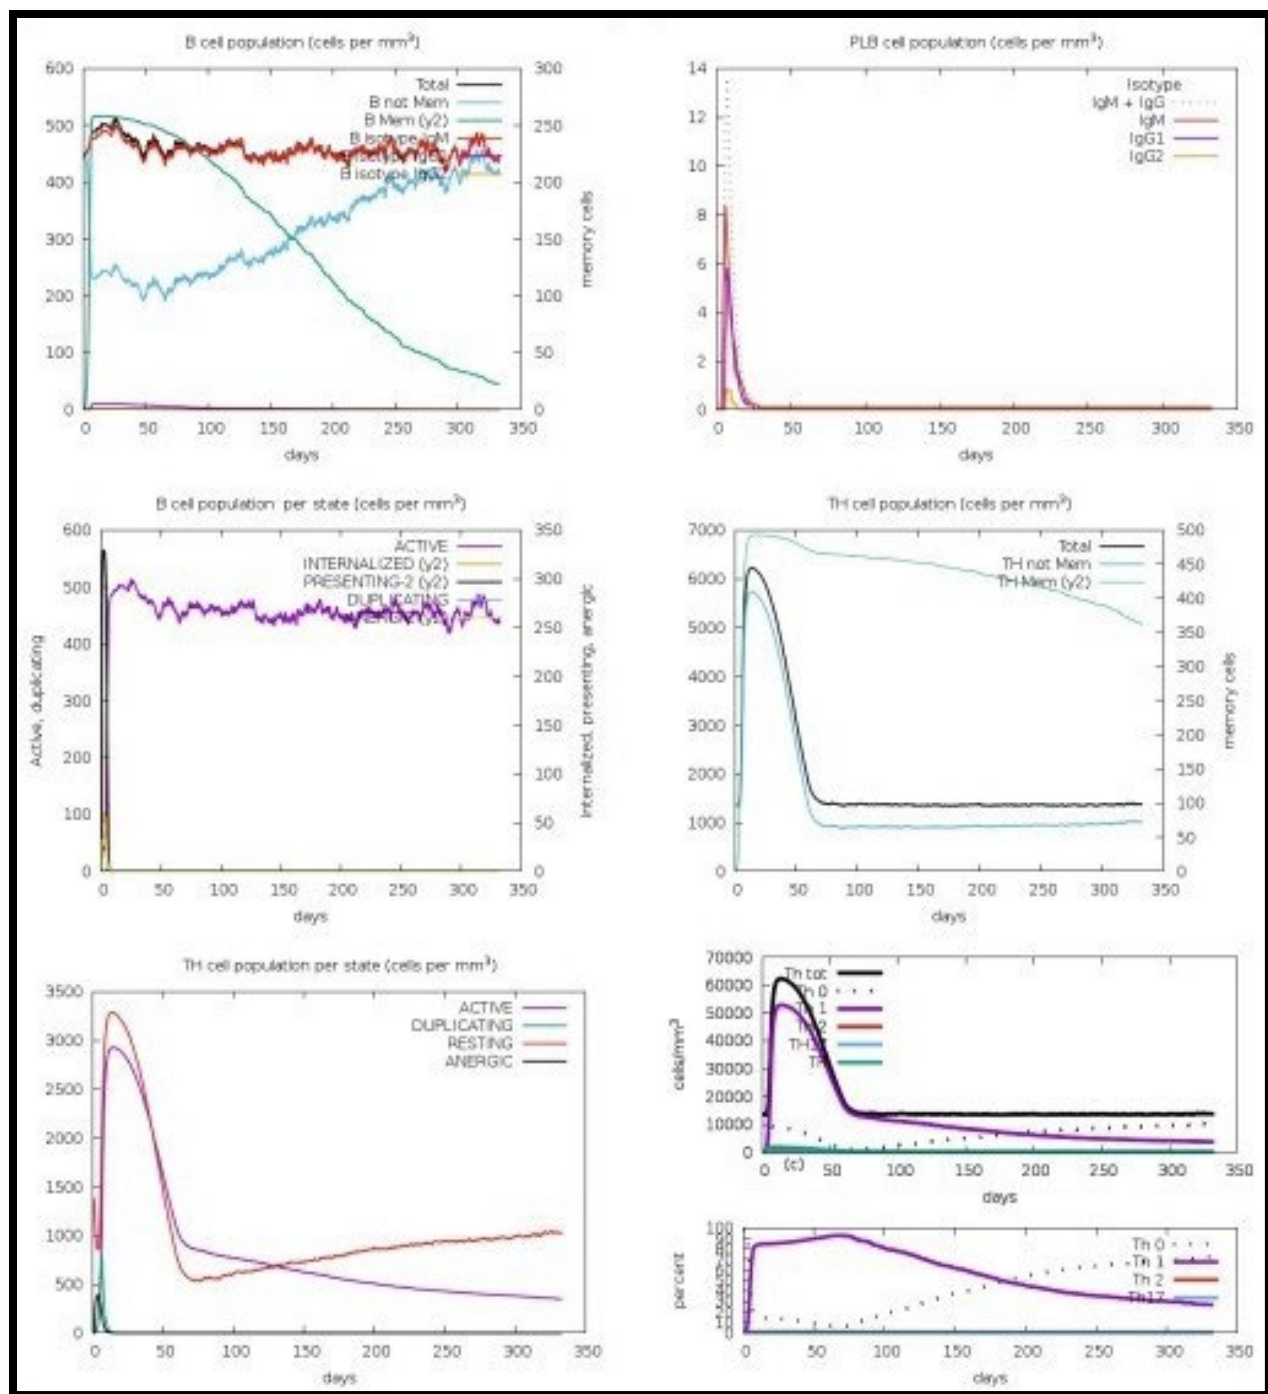

**Figure S3.** Different B and T-cell responses against the vaccine

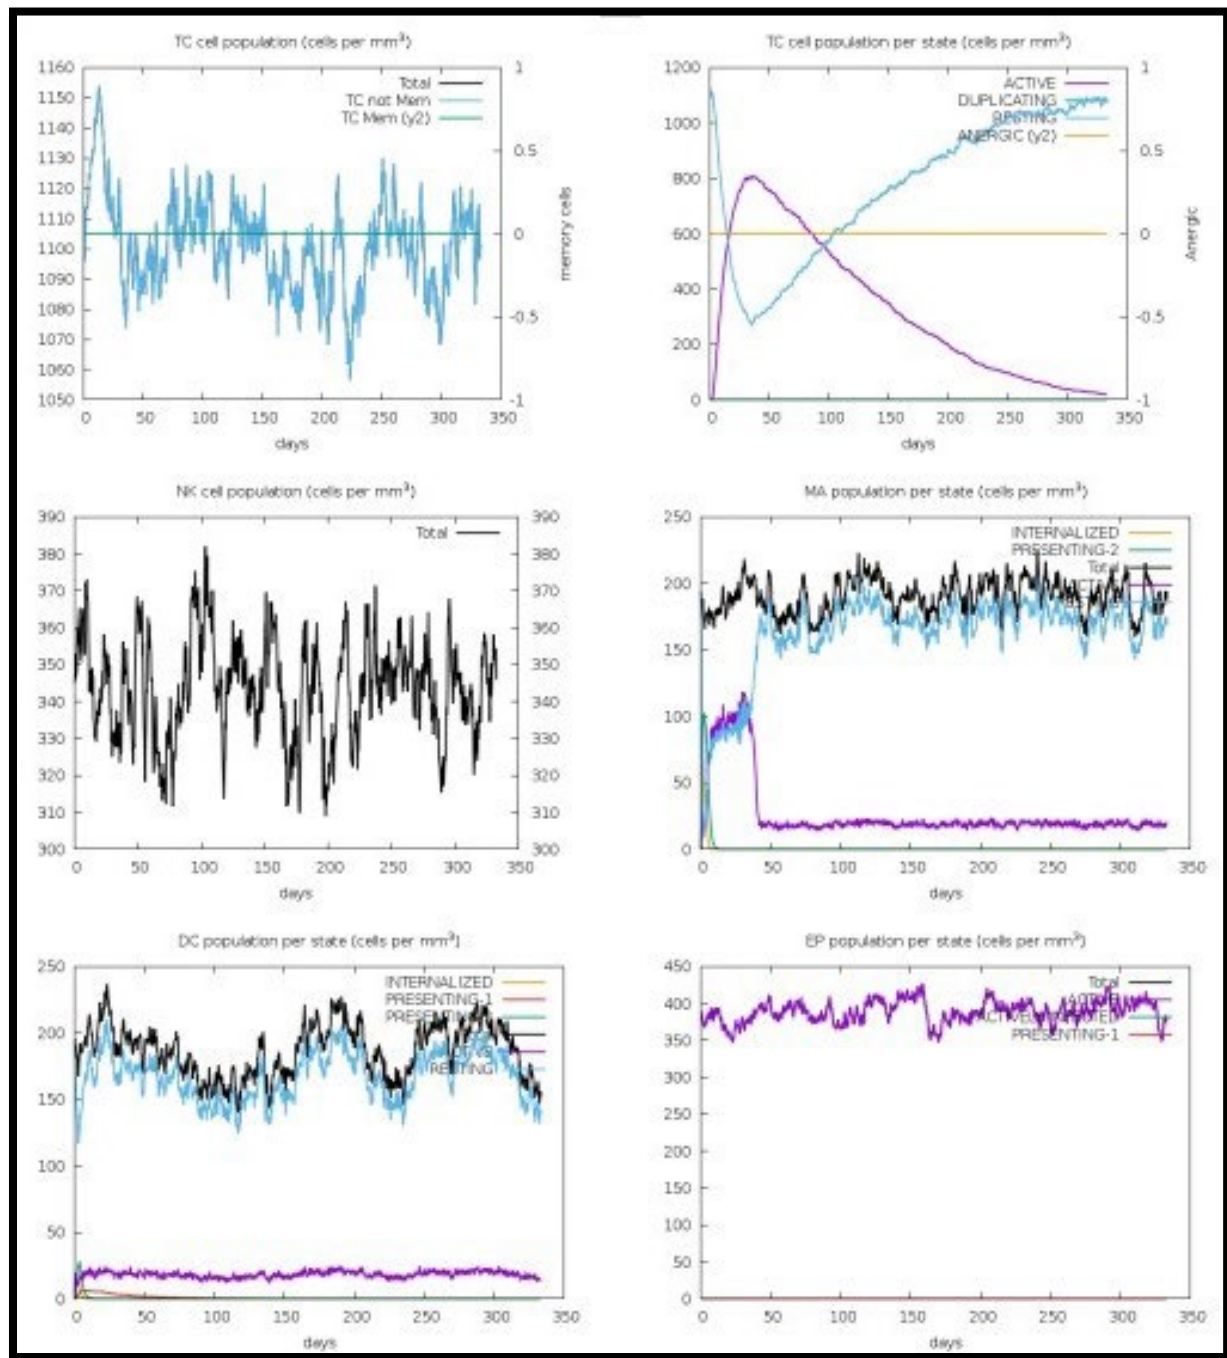

**Figure S4.** Different immune cell responses are generated in response to the chimeric vaccine construct. T<sub>c</sub> (cytotoxic killer T-cell), macrophages (Mφ), natural killer cell, dendritic and epithelial cell.

**Table S1.** Predicted B-cell epitopes.

| <b>Protein</b>                                                                                 | <b>Predicted B–cell epitopes</b>                                                                                              |
|------------------------------------------------------------------------------------------------|-------------------------------------------------------------------------------------------------------------------------------|
| >core/4909/2<br>/Org2_Gene2<br>897<br><br>Fimbrial<br>protein                                  | LASGSDALKV                                                                                                                    |
|                                                                                                | LGKVSKKALPSAGSTAAA                                                                                                            |
|                                                                                                | DATSYPGDDSVIELKDAGQSGVA                                                                                                       |
|                                                                                                | VIPLFTASKAYPLKDGVENN                                                                                                          |
|                                                                                                | IAQTANVGV                                                                                                                     |
| >core/1455/1<br>4/(Org14_Ge<br>ne1001<br>Flagellar<br>hook protein<br>FlgE)                    | TNGFKGATTSFADMFAGSGVGLG                                                                                                       |
|                                                                                                | TQNFKDGPITRTD                                                                                                                 |
|                                                                                                | YPASVDEKGNVTIQSGGVPEGLNIPTDMMDAKAS                                                                                            |
|                                                                                                | INLNSEDKIKDKAFDVDNPDDSATYNFSTTMTAYDSQGNTHEISVYFV<br>KTADNKWTAYAKDANDTAATKLGDMSFDGNGKLVTETVTPGPNPG<br>DDPVVTPIETTFDFAYKGLNGAND |
|                                                                                                | LGKTRQQKVSESSVSAIDVNGYPAGEYTTF                                                                                                |
|                                                                                                | PNGLVSQGGNVWASSNASGNPMDGVPGVGQFGK                                                                                             |
| >core/3432/1<br>/Org1_Gene4<br>222<br><br>(Flagellar<br>basal body L-<br>ring protein<br>FlgH) | TLQQKSSMMIESSTISQQQKIALQTPLI                                                                                                  |
|                                                                                                | HIKSRPLVDTQTTAIPSAPTAPAPNGSIFQSAQPAYYGYQPLFEDRRPRN<br>VG                                                                      |
|                                                                                                | VSASKNSSANANRTGKTGFLAAILPGFMQGWIGGKNTELDIKGNSDFS<br>GKGGANAN                                                                  |
|                                                                                                | DGYINESQNMGW                                                                                                                  |
| >core/6354/1<br>/Org1_Gene7<br>19 (Flagellar                                                   | SQLNVVATQATNPTKPIIEPVG                                                                                                        |
|                                                                                                |                                                                                                                               |

|                                                                                                             |                                     |
|-------------------------------------------------------------------------------------------------------------|-------------------------------------|
| hook-basal<br>body<br>complex<br>protein FliE)                                                              | NDSAKQVENFTLGKQDISL                 |
| >core/4058/2<br>/Org2_Gene3<br>304<br><br>(Flagellar<br>basal body P-<br>ring<br>formation<br>protein FlgA) | PQDIDQYFRKIHGKQNSV                  |
|                                                                                                             | IEIKTPIDKWPNC DKPQIGLPSGGRNM        |
|                                                                                                             | NIQKGETIEFVDIGTKKGLIHQLPSGASTDKMALR |
|                                                                                                             | LRNITAGQTFTSSMVRPWA                 |
|                                                                                                             | INNAAMGEN                           |
| >core/3402/4<br>/Org4_Gene1<br>551 (Gram-<br>negative pili<br>assembly<br>chaperone<br>domain<br>protein)   | MMKNKLMNKKNAH                       |
|                                                                                                             | SIIPTREQMDNPWQ                      |
|                                                                                                             | PNKNGQTVAGFE                        |

**Table S2.** MHC-I and MHC-II predicted epitopes with a percentile score

| <b>MHC I epitopes</b> | <b>Percentile score</b> | <b>MHC II epitope</b> | <b>Percentile score</b> |
|-----------------------|-------------------------|-----------------------|-------------------------|
| LPSAGSTAA             | 0.29                    | KALPSAGSTAAA          | 2.4                     |
| KALPSAGSTA            | 2.6                     |                       |                         |
| GDDSVIELK             | 3.4                     | PGDDSVIELKDA          | 15                      |
| DSVIELKDA             | 9                       |                       |                         |
| FTASKAYPL             | 0.09                    | PLFTASKAYPL           | 0.01                    |
| PLFTASKAY             | 0.33                    |                       |                         |
| GFKGATTSF             | 0.24                    | NGFKGATTSF            | 0.16                    |
| NGFKGATTSF            | 0.77                    |                       |                         |
| MFAGSGVGL             | 1.1                     | DMFAGSGVGLG           | 1.4                     |
| DMFAGSGVGL            | 1.9                     |                       |                         |
| NFKDGPITR             | 0.01                    | TQNFKDGPITRTD         | 28.07                   |
| TQNFKDGP              | 6.8                     |                       |                         |
| VDEKGNVTI             | 2.1                     | VDEKGNVTIQSG          | 3.4                     |
| KGNVTIQSG             | 9.9                     |                       |                         |
| GLNIPTDMM             | 1.9                     | GVPEGLNIPTDMM         | 27                      |
| GVPEGLNIPT            | 4.8                     |                       |                         |
| ATYNFSTTM             | 0.06                    | ATYNFSTTMTAYDSQ       | 2                       |
| TTMTAYDSQ             | 4.3                     |                       |                         |

|            |      |                  |     |
|------------|------|------------------|-----|
| KIKDKAFDV  | 0.39 | KIKDKAFDVDNPDDS  | 5.5 |
| FDVDNPDDS  | 26   |                  |     |
| NTHEISVYF  | 0.03 | GNTHEISVYFVKTAD  | 12  |
| SVYFVKTAD  | 10   |                  |     |
| YAKDANDTA  | 1.5  | NKWTAYAKDANDTAA  | 6.8 |
| NKWTAYAKDA | 44   |                  |     |
| ATKLGDMSF  | 0.12 | ATKLGDMSFDGNGKL  | 5.8 |
| MSFDGNGKL  | 0.23 |                  |     |
| ETVTPGPNP  | 1.1  | KLV TETVTPGPNPGD | 14  |
| KLV TETVTP | 2.3  |                  |     |
| VVTPIETTF  | 0.05 | PGDDPVVTPIETTFD  | 20  |
| PGDDPVVTPI | 13   |                  |     |
| KVSESSVSA  | 0.46 | QKVSESSVSAI      | 5.4 |
| KVSESSVSAI | 0.83 |                  |     |
| YPAGEYTTF  | 0.01 | DVNGYPAGEYTTF    | 13  |
| DVNGYPAGEY | 0.04 |                  |     |
| LVSQGGNVW  | 0.09 | LVSQGGNVWAS      | 2.2 |
| SQGGNVWAS  | 2    |                  |     |
| NPMDGVPGV  | 0.08 | GNPMDGVPGVGQFGK  | 14  |
| GVPGVGQFGK | 0.43 |                  |     |

**Table S3.** Docking score of top 20 docked vaccine complex with MHC-I molecule.

| <b>Solution No</b> | <b>Score</b> | <b>Area</b> | <b>Atomic Contact Energy (Kj/mol)</b> |
|--------------------|--------------|-------------|---------------------------------------|
| 1                  | 19720        | 2869.6      | 340.01                                |
| 2                  | 18564        | 2649.9      | 152.45                                |
| 3                  | 18370        | 2385.9      | 486.55                                |
| 4                  | 18312        | 3332.6      | -110.49                               |
| 5                  | 18134        | 2767.6      | 366.92                                |
| 6                  | 18122        | 3006        | 240.11                                |
| 7                  | 18114        | 2655.7      | 419.53                                |
| 8                  | 17984        | 3034        | 207.03                                |
| 9                  | 17944        | 2750.6      | 484.53                                |
| 10                 | 17828        | 2353.8      | 329.07                                |
| 11                 | 17680        | 2694.6      | 497.52                                |
| 12                 | 17348        | 3205.9      | 115.70                                |
| 13                 | 17334        | 3081.2      | 100.24                                |
| 14                 | 17308        | 3378.6      | 387.97                                |
| 15                 | 17216        | 2519.6      | 343.27                                |
| 16                 | 17138        | 4053.4      | 43.63                                 |
| 17                 | 17056        | 2934.2      | 88.51                                 |
| 18                 | 16882        | 3289.2      | 204.41                                |

|    |       |        |        |
|----|-------|--------|--------|
| 19 | 16804 | 2521.1 | 439.43 |
| 20 | 16752 | 2161.9 | 397.81 |

**Table S4.** Docking score of top 20 docked vaccine complex to MHC-II molecule.

| <b>Solution No</b> | <b>Score</b> | <b>Area</b> | <b>Atomic Contact Energy (Kj/mol)</b> |
|--------------------|--------------|-------------|---------------------------------------|
| 1                  | 18648        | 2946.4      | 206.29                                |
| 2                  | 17954        | 2914.1      | 213.33                                |
| 3                  | 17572        | 2758.3      | 204.33                                |
| 4                  | 17488        | 2844.3      | 290.31                                |
| 5                  | 17434        | 2296.2      | 137.21                                |
| 6                  | 17230        | 2552.9      | 174.45                                |
| 7                  | 17148        | 2242.9      | 376.22                                |
| 8                  | 17130        | 2984.2      | 287.60                                |
| 9                  | 17122        | 2585        | -25.83                                |
| 10                 | 17078        | 3184.6      | 220.48                                |
| 11                 | 16968        | 2203.2      | 381.82                                |
| 12                 | 16946        | 3443.8      | 225.29                                |
| 13                 | 16636        | 2620.4      | 133.95                                |
| 14                 | 16606        | 3320.8      | 280.04                                |
| 15                 | 16486        | 2979.7      | -35.23                                |
| 16                 | 16462        | 2336.2      | -70.37                                |

|    |       |        |        |
|----|-------|--------|--------|
| 17 | 16368 | 2343.6 | 38.22  |
| 18 | 16258 | 2351.1 | 217.02 |
| 19 | 16158 | 2495.1 | 295.20 |
| 20 | 16078 | 2176.1 | 117.02 |

**Table S5.** Docking score of top 20 docked vaccine complex to TLR4 molecule.

| <b>Solution No</b> | <b>Score</b> | <b>Area</b> | <b>Atomic Contact Energy (Kj/mol)</b> |
|--------------------|--------------|-------------|---------------------------------------|
| 1                  | 21264        | 3863.6      | 231.13                                |
| 2                  | 20686        | 2786.4      | 321.49                                |
| 3                  | 19772        | 3454.7      | 95.62                                 |
| 4                  | 18814        | 2775.7      | 438.07                                |
| 5                  | 18744        | 2886.8      | 454.84                                |
| 6                  | 18368        | 2859.5      | 409.96                                |
| 7                  | 18294        | 3199.8      | 320.28                                |
| 8                  | 18132        | 2452.3      | 499.25                                |
| 9                  | 18078        | 3140.3      | -1.52                                 |
| 10                 | 17648        | 3024.8      | 309.62                                |
| 11                 | 17580        | 2894.2      | 403.63                                |
| 12                 | 17478        | 2862.6      | 403.20                                |
| 13                 | 17110        | 2372.6      | 197.67                                |

|    |       |        |        |
|----|-------|--------|--------|
| 14 | 16942 | 3195.6 | 365.43 |
| 15 | 16940 | 2080.6 | 183.43 |
| 16 | 16908 | 2161.2 | 231.62 |
| 17 | 16858 | 2279.9 | 80.98  |
| 18 | 16782 | 3679.5 | 193.10 |
| 19 | 16748 | 2468.7 | 241.49 |
| 20 | 16692 | 2925.1 | 408.54 |

**Table S6.** Top 10 refined docked complexes of vaccine-MHC-I complexes.

| <b>Rank</b> | <b>Solution Number</b> | <b>Global Energy</b> | <b>Attractive van der Waals Energy</b> | <b>Repulsive van der Waals Energy</b> | <b>Atomic Contact Energy</b> | <b>Hydrogen bond Energy</b> |
|-------------|------------------------|----------------------|----------------------------------------|---------------------------------------|------------------------------|-----------------------------|
| 1           | 8                      | -12.72               | -6.67                                  | 0.73                                  | 1.39                         | -0.43                       |
| 2           | 4                      | 1.96                 | -9.29                                  | 0.34                                  | -0.80                        | -1.28                       |
| 3           | 3                      | 27.39                | -4.55                                  | 6.23                                  | 6.96                         | -0.44                       |
| 4           | 9                      | 31.50                | -25.67                                 | 12.89                                 | 10.98                        | -2.41                       |
| 5           | 1                      | 44.13                | -26.56                                 | 64.95                                 | 14.15                        | -5.77                       |
| 6           | 10                     | 385.38               | -32.47                                 | 468.30                                | 9.96                         | -1.05                       |
| 7           | 2                      | 1105.21              | -53.45                                 | 1431.20                               | 12.34                        | -6.29                       |
| 8           | 7                      | 1135.23              | -22.48                                 | 1412.47                               | 8.00                         | -3.28                       |
| 9           | 5                      | 2746.08              | -61.53                                 | 3514.66                               | 25.26                        | -14.26                      |
| 10          | 6                      | 8950.81              | -69.38                                 | 11339.83                              | -11.34                       | -4.87                       |

**Table S7.** Top 10 refined docked complexes of vaccine-MHC-II.

| <b>Rank</b> | <b>Solution Number</b> | <b>Global Energy</b> | <b>Attractive van der Waals Energy</b> | <b>Repulsive van der Waals Energy</b> | <b>Atomic Contact Energy</b> | <b>Hydrogen bond Energy</b> |
|-------------|------------------------|----------------------|----------------------------------------|---------------------------------------|------------------------------|-----------------------------|
| 1           | 2                      | 36.23                | -1.79                                  | 0.31                                  | 2.02                         | 0.00                        |
| 2           | 6                      | 230.88               | -11.98                                 | 258.67                                | 7.34                         | -1.79                       |
| 3           | 7                      | 274.08               | -15.30                                 | 350.15                                | 12.35                        | -1.37                       |
| 4           | 3                      | 2061.33              | -32.34                                 | 2553.77                               | 22.85                        | -0.75                       |
| 5           | 4                      | 2122.83              | -45.05                                 | 2708.40                               | 4.16                         | -5.83                       |
| 6           | 5                      | 2177.67              | -93.11                                 | 2926.27                               | -5.98                        | -13.45                      |
| 7           | 9                      | 3832.02              | -43.55                                 | 4891.34                               | -4.23                        | -6.03                       |
| 8           | 10                     | 4044.56              | -33.23                                 | 5060.52                               | 11.17                        | -1.84                       |

|    |   |         |        |          |      |        |
|----|---|---------|--------|----------|------|--------|
| 9  | 8 | 4426.42 | -46.94 | 5572.97  | 6.57 | -12.44 |
| 10 | 1 | 8857.37 | -66.09 | 11187.25 | 7.04 | -15.06 |

**Table S8.** Top 10 refined docked complexes of vaccine-TLR4.

| <b>Rank</b> | <b>Solution Number</b> | <b>Global Energy</b> | <b>Attractive van der Waals Energy</b> | <b>Repulsive van der Waals Energy</b> | <b>Atomic Contact Energy</b> | <b>Hydrogen bond Energy</b> |
|-------------|------------------------|----------------------|----------------------------------------|---------------------------------------|------------------------------|-----------------------------|
| 1           | 5                      | 6.97                 | -7.46                                  | 9.51                                  | 1.34                         | -0.85                       |
| 2           | 8                      | 8.93                 | -28.83                                 | 20.67                                 | 11.95                        | -3.48                       |
| 3           | 6                      | 35.64                | -29.46                                 | 59.10                                 | 13.99                        | -4.69                       |
| 4           | 2                      | 88.80                | -44.36                                 | 171.58                                | 11.83                        | -3.82                       |
| 5           | 4                      | 167.70               | -35.37                                 | 233.56                                | 16.82                        | -1.66                       |
| 6           | 10                     | 291.89               | -23.52                                 | 394.24                                | 13.67                        | -3.94                       |
| 7           | 3                      | 355.79               | -50.06                                 | 461.66                                | 19.31                        | -6.29                       |
| 8           | 9                      | 612.36               | -56.93                                 | 857.91                                | 11.82                        | -5.28                       |
| 9           | 7                      | 776.79               | -38.69                                 | 976.63                                | 20.46                        | -5.25                       |
| 10          | 1                      | 5299.49              | -64.47                                 | 6725.73                               | 8.55                         | -9.14                       |
